# Supplementary material for: Chapter 6: quantifying greenhouse gas sources and sinks in managed forest systems
Source: Royal Society of Chemistry journal article supplement (doi:10.1039/c7an02089a), 2014-01-01
Supplement: c7an02089a1.pdf [file c7an02089a1.pdf]

## Supporting information

### **Barbituric acid-modified graphitic carbon nitride nanosheets for ratiometric fluorescent detection of Cu<sup>2+</sup>**

Ling chen, Zhiping Song, Xueting Liu, Liangqia Guo,\* Mei-jin Li\*, Fengfu Fu

Ministry of Education Key Laboratory for Analytical Science of Food Safety and  
Biology, Fujian Provincial Key Laboratory of Analysis and Detection Technology for  
Food Safety, and College of Chemistry, Fuzhou University, Fuzhou, Fujian, 3501168,  
China.

Email: [lqguo@fzu.edu.cn](mailto:lqguo@fzu.edu.cn); [mjli@fzu.edu.cn](mailto:mjli@fzu.edu.cn); Tel: 086-591-22866135

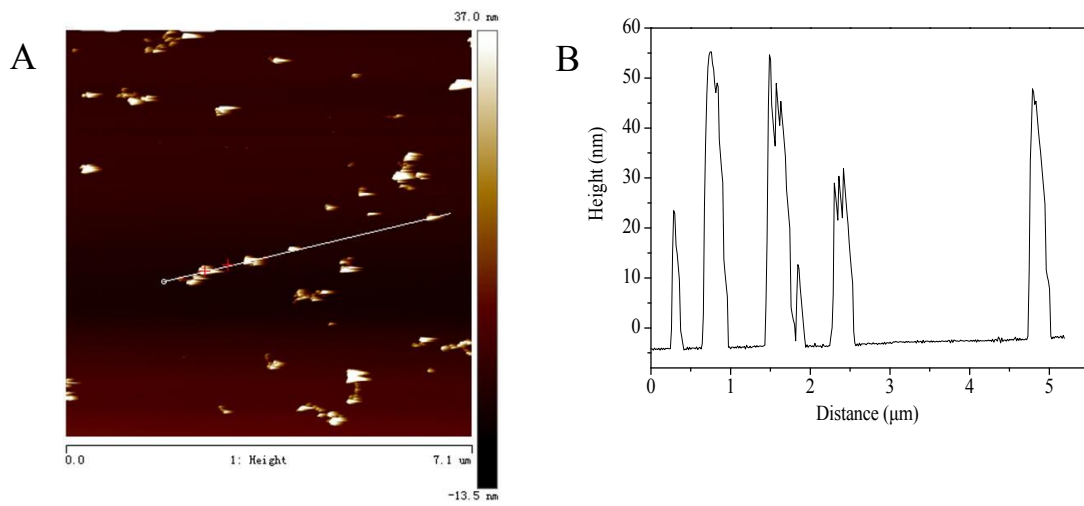

Figure S1. AFM image of BCN nanosheets (A) and corresponding height image (B).

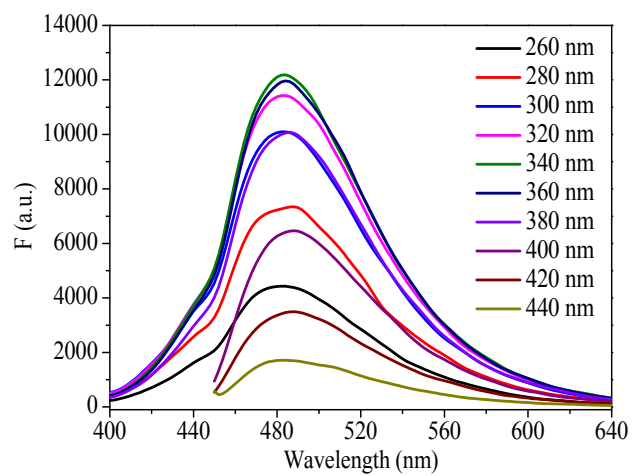

**Figure S2.** Fluorescence spectra of BCN nanosheets (0.161 mg/mL) with different excitation wavelength

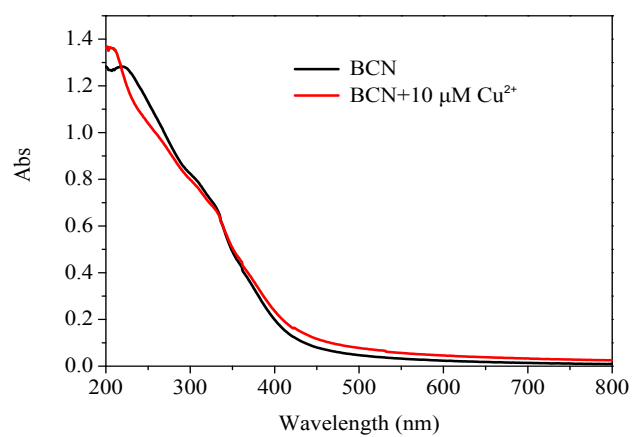

**Figure S3.** The UV-Vis spectra of BCN nanosheets (0.187 mg/mL) solutions before and after addition of Cu<sup>2+</sup>.

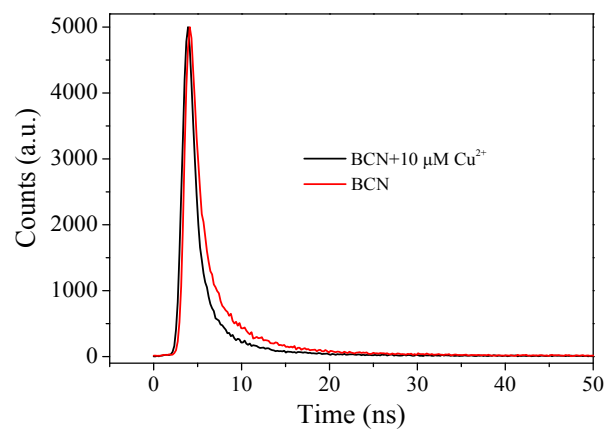

**Figure S4.** The decay curves of BCN nanosheets (0.187 mg/mL) in the absence and presence of 10  $\mu\text{M}$   $\text{Cu}^{2+}$ . The decay curves were recorded at the maximal emission peak (488 nm) with the excitation wavelength of 325 nm.

**Table S1.** Fluorescence lifetime parameters of BCN nanosheets (0.187 mg/mL) in the absence and presence of 10  $\mu\text{M}$   $\text{Cu}^{2+}$

|                                        | $\tau_1/\text{ns}$ | Rel%  | $\tau_2/\text{ns}$ | Rel%  | $\tau_3/\text{ns}$ | Rel%  | $\chi^2$ | $\tau_{\text{average}}/\text{ns}$ |
|----------------------------------------|--------------------|-------|--------------------|-------|--------------------|-------|----------|-----------------------------------|
| BCN nanosheets                         | 0.94               | 30.63 | 3.30               | 44.15 | 10.10              | 25.22 | 0.97     | 4.29                              |
| BCN nanosheets<br>and $\text{Cu}^{2+}$ | 0.96               | 50.87 | 3.46               | 32.22 | 8.52               | 16.91 | 1.12     | 3.04                              |

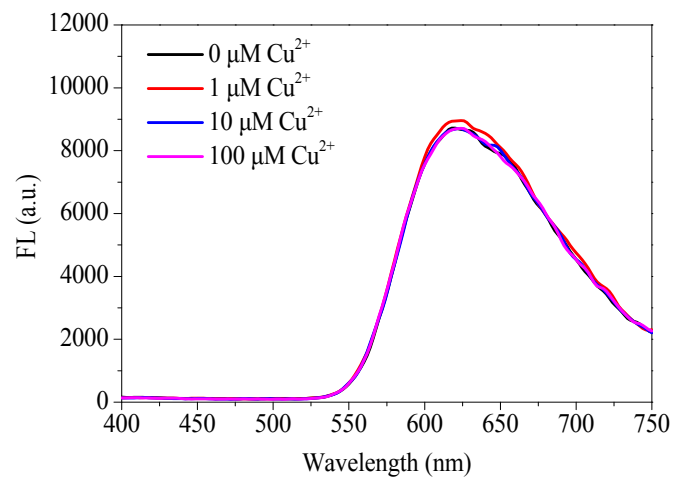

**Figure S5.** Emission spectra of Ru(bpy)<sub>3</sub>Cl<sub>2</sub> (4.025 μg/mL ) on adding of different concentration of Cu<sup>2+</sup>

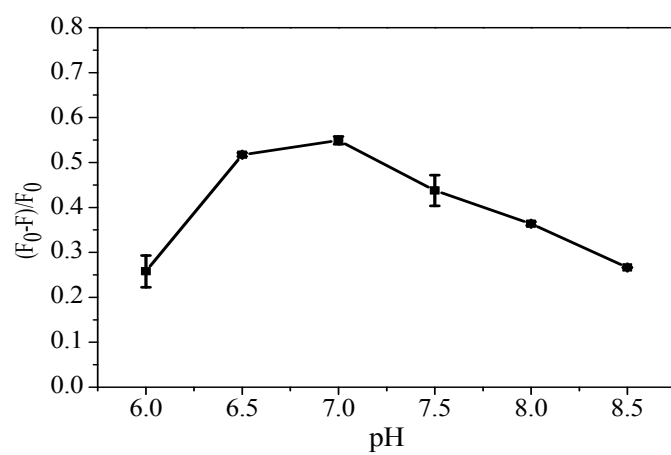

**Figure S6.** Effect of pH on the ratio of fluorescence quenching of BCN nanosheets (BCN nanosheets: 0.187 mg/mL;  $\text{Cu}^{2+}$ : 10  $\mu\text{M}$ )



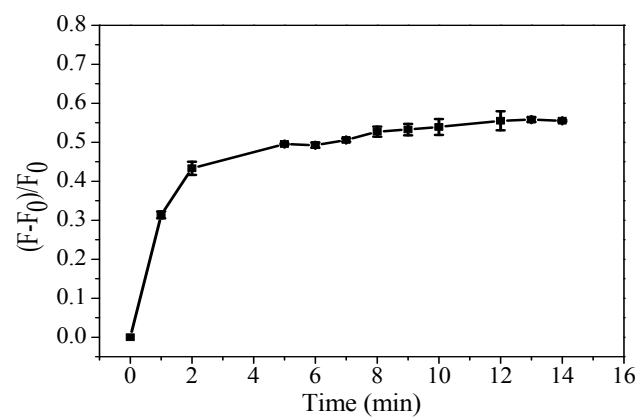

**Figure S7.** Effect of incubation time on the ratio of fluorescence quenching of BCN nanosheets (BCN nanosheets:0.187 mg/mL;  $\text{Cu}^{2+}$ : 10  $\mu\text{M}$ )

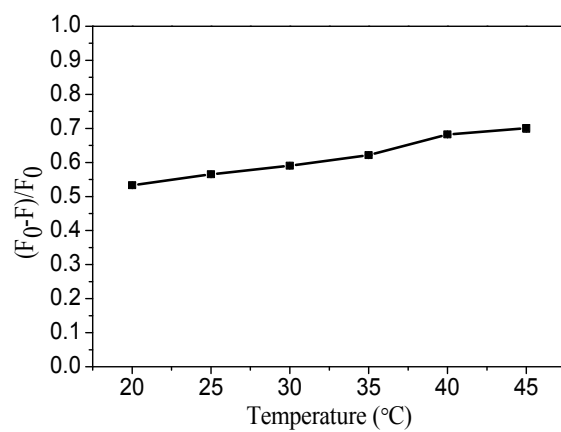

**Figure S8.** Effect of temperature on the ratio of fluorescence quenching of BCN nanosheets (BCN nanosheets:0.187 mg/mL;  $\text{Cu}^{2+}$ : 10  $\mu\text{M}$ )

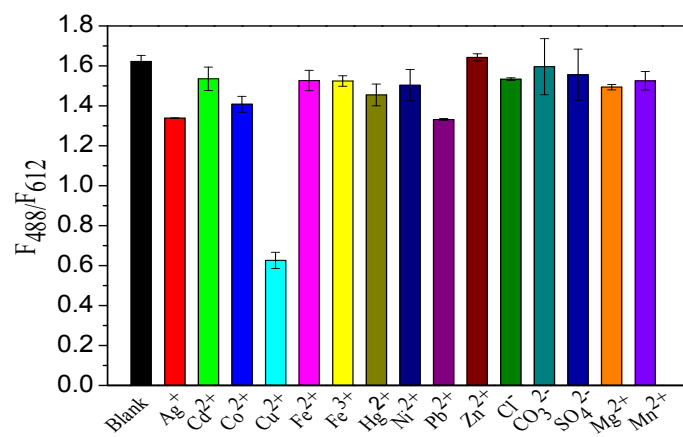

**Figure S9.** The ratio of fluorescence intensity ( $F_{488}/F_{612}$ ) of the probe on addition of different cations and anions (all ions were 10  $\mu$ M).
